# Supplementary material
Source: PubMed Central journal article supplement (PMC7611676)
Supplement: EMS129588-supplement-Supplementary_Information.pdf [file EMS129588-supplement-Supplementary_Information.pdf]

# Supplementary Information for Modality Attention and Sampling Enables Deep Learning with Heterogeneous Marker Combinations in Fluorescence Microscopy

**Supplementary Table 1:** Summary of the annotated bone marrow dataset employed for training and evaluation of the proposed methods. There are 8 different samples composed of different annotated patches. The annotated classes are either sinusoids or arteries. The remaining pixels are considered background. There is a notable class imbalance, with most of the pixels being background and arteries being a minority class.

| sample id ( $s^i$ ) | # patches ( $J^i$ ) | sinusoids (%) | arteries (%) |
|---------------------|---------------------|---------------|--------------|
| 1                   | 54                  | 9.71          | 0.29         |
| 2                   | 12                  | 7.87          | 0.99         |
| 3                   | 30                  | 11.97         | 0.21         |
| 4                   | 12                  | 11.20         | 0.98         |
| 5                   | 12                  | 10.93         | 0.58         |
| 6                   | 48                  | 13.60         | 0.24         |
| 7                   | 54                  | 11.23         | 0.24         |
| 8                   | 8                   | 15.19         | 0.27         |
| TOTAL               | 230                 | 11.41         | 0.34         |

**Supplementary Table 2:** Comparison of bone marrow vasculature quantification as previously reported with segmentation based on Morphological Image Processing (MIP), and with the *MS-ME* model proposed in the current work. Arteries appear as not available (n/a) because their segmentation could not be achieved with the earlier MIP approach. Manual work herein refers to the user interaction required to apply a method on a sample.

|                  | sinusoids     |                  | arteries |                  |
|------------------|---------------|------------------|----------|------------------|
|                  | MIP [24]      | MS-ME (proposed) | MIP [24] | MS-ME (proposed) |
| <i>F1</i> -score | 61.9±15.7     | 91.2±3.9         | n/a      | 71.2±4.4         |
| # samples        | 12            | 47               | n/a      | 29               |
| manual work      | 30 min/sample | automatic        | n/a      | automatic        |

**Supplementary Table 3:** Summary of the annotated dataset employed for the segmentation of fetal liver vasculature, where the only class is named *vessels* and the remaining pixels are considered background.

| sample id ( $s^i$ ) | # patches ( $J^i$ ) | vessels (%) |
|---------------------|---------------------|-------------|
| 0                   | 4                   | 20.33       |
| 1                   | 8                   | 20.81       |
| 2                   | 4                   | 18.88       |
| 3                   | 4                   | 13.25       |
| 4                   | 4                   | 20.54       |
| 5                   | 8                   | 21.11       |
| 6                   | 4                   | 25.43       |
| 7                   | 4                   | 15.41       |
| 8                   | 4                   | 27.20       |
| 9                   | 4                   | 10.04       |
| 10                  | 8                   | 12.78       |
| 11                  | 4                   | 25.04       |
| 12                  | 4                   | 17.90       |
| 13                  | 4                   | 21.67       |
| 14                  | 4                   | 31.79       |
| 15                  | 4                   | 5.32        |
| 16                  | 8                   | 6.97        |
| 17                  | 4                   | 23.02       |
| 18                  | 9                   | 18.69       |
| 19                  | 4                   | 18.39       |
| 20                  | 4                   | 20.79       |
| 21                  | 4                   | 27.87       |
| 22                  | 4                   | 22.87       |
| 23                  | 8                   | 12.27       |
| 24                  | 4                   | 1.41        |
| 25                  | 17                  | 16.97       |
| TOTAL               | 142                 | 17.72       |

**Supplementary Table 4:** Computational complexity of the different models employed. Time is calculated as the median across batches. GPU memory footprint refers to the maximum usage recorded during training. Note that *UB* is an ensemble of 31 models, and hence the increase in parameters only affects the training time. A single model is employed at inference for the pertinent marker combination, making the inference time equivalent to that of a single model.

| Models   | Training time<br>(ms/batch) | Inference time<br>(ms/batch) | GPU memory<br>footprint (GB) | # parameters<br>( $\times 10^6$ ) |
|----------|-----------------------------|------------------------------|------------------------------|-----------------------------------|
| MZ       | 0.28                        | 0.20                         | 0.95                         | 7.76                              |
| HeMIS    | 1.07                        | 0.17                         | 3.8                          | 0.35                              |
| MS       | 0.32                        | 0.19                         | 0.95                         | 7.76                              |
| HeMIS-MS | 1.00                        | 0.20                         | 3.9                          | 0.35                              |
| MS-DR    | 0.34                        | 0.17                         | 0.95                         | 7.76                              |
| MS-VR    | 0.32                        | 0.18                         | 0.95                         | 7.76                              |
| MS-SE    | 0.35                        | 0.15                         | 1.12                         | 8.2                               |
| MS-ME    | 0.34                        | 0.2                          | 1.16                         | 7.81                              |
| MS+      | 0.25                        | 0.18                         | 1.05                         | 9.35                              |
| UB       | 7.57                        | 0.2                          | 0.95                         | 240.56                            |
